# Supplementary material for: Risk assessment and HbA1c measurement in Norwegian community pharmacies to identify people with undiagnosed type 2 diabetes – A feasibility study
Source: PubMed Central journal article supplement (PMC5825028; doi:10.1371/journal.pone.0191316), 2018-02-23
Supplement: pone.0191316.s001.pdf [file pone.0191316.s001.pdf]

## Appendix 1.

4. Where did you hear about this service (that you can test your diabetes risk at the pharmacy)?

(You can tick off several alternatives)

- A. Here at the pharmacy
- B. From family or acquaintances
- C. Read about it in the newspaper
- D. Through websites or social media
- E. Other, please specify \_\_\_\_\_

Here are the results from the category “other”:

| English                                                          | Number |
|------------------------------------------------------------------|--------|
| Apotek 1 Landås<br>(another pharmacy in the same pharmacy chain) | 1      |
| Facebook                                                         | 1      |
| From a friend                                                    | 1      |
| Radio                                                            | 2      |
