# Supplementary material for: Risk assessment and HbA1c measurement in Norwegian community pharmacies to identify people with undiagnosed type 2 diabetes – A feasibility study
Source: PubMed Central journal article supplement (PMC5825028; doi:10.1371/journal.pone.0191316), 2018-02-23
Supplement: pone.0191316.s002.pdf [file pone.0191316.s002.pdf]

## S2 Appendix 2

Question 5. On Background Questionnaire:

Why do you want to take a diabetes risk test?

(You can tick off several alternatives)

- A. Just to check
- B. Because I have family who has diabetes
- C. I have been worried I might have diabetes
- D. I was encouraged by others
- E. Other, please specify-

Here are the 21 answer from the “other” category

Blood sugar drops suddenly, I do need food

I think I have an unhealthy lifestyle

I had gestational diabetes and I am at risk

I have been at the borderline at a visit to my GP

I have ME / CFS and has many different symptoms. It is not easy for me to distinguish what is what, if I should have diabetes.

I have been very tired over time

I recognized some of the symptoms

I read about it and thought that the symptoms fit

I read an article about the study in the newspaper, and recognized some of the symptoms of diabetes.

Much dizzy, reacts to sugar.

Because of tiredness

I do not feel well after eating sugar

Very thirsty, I go to the toilet a lot when I have drunk so much. I wake up at night and must I have something sweet - fast

I heard about the project

I am eating a lot of chocolate and rice

My mom is at risk

Elevated blood sugar during testing

PCOS, thus I have been told that I am predisposed

To check if I am predisposed to get it

I think I eat a lot of sugar, 0.5 kg a week. Much carbohydrate.

I was in Spain with a doctor 3 years ago, diabetes was detected

---
